# Supplementary material
Source: PubMed Central journal article supplement (PMC4901131)

# Figure S4

**A**

*NK92 cell line*

KIR

2DL1, 2DL2, 2DL3, 2DL4, 2DS1, 2DS2, 2DS3, 2DS5, 3DL1

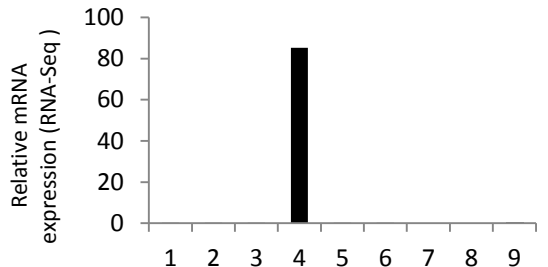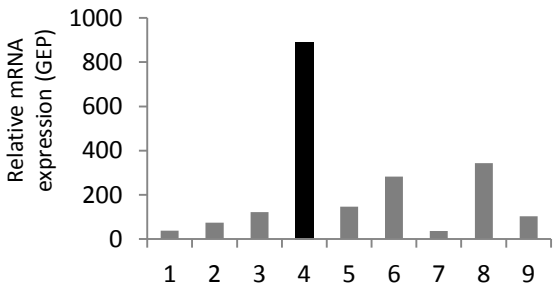

**B**

*KHYG1 cell line*

KIR

2DL1, 2DL2, 2DL3, 2DL4, 2DS1, 2DS2, 2DS3, 2DS5, 3DL1

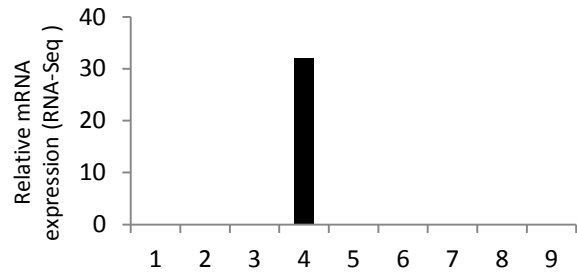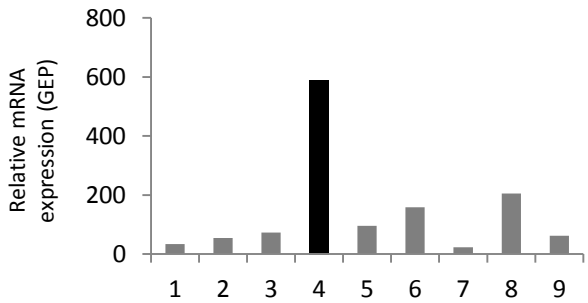

**C**

*NKYS cell line*

KIR

2DL1, 2DL2, 2DL3, 2DL4, 2DS1, 2DS2, 2DS3, 2DS5, 3DL1

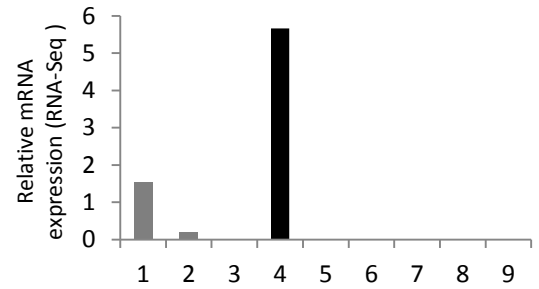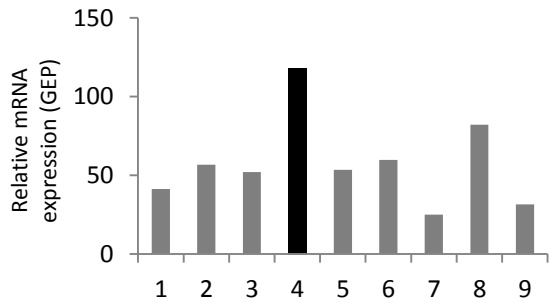

Supplement: mmc6.pdf [file mmc6.pdf]
