# Supplementary material
Source: PubMed Central journal article supplement (PMC4901131)

# Figure S1

**A**

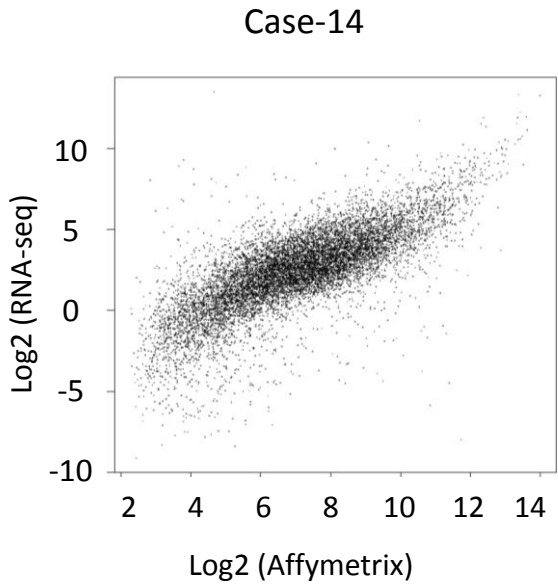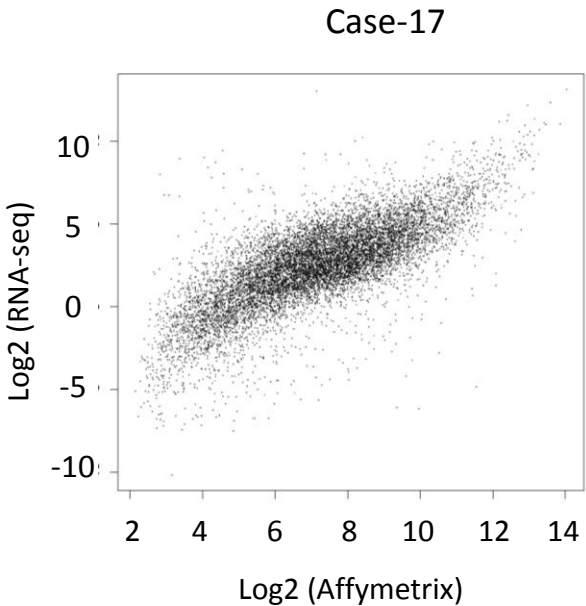

**B**

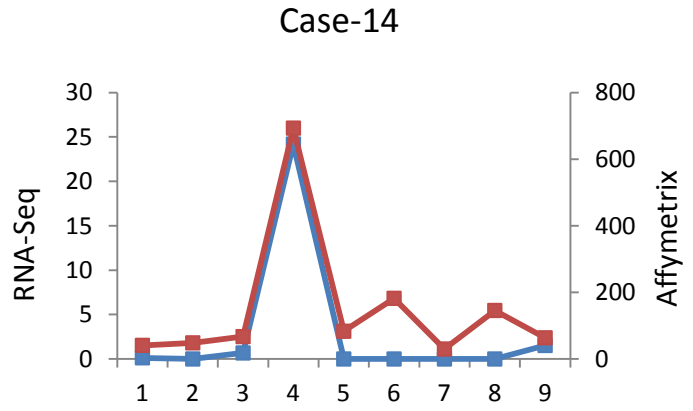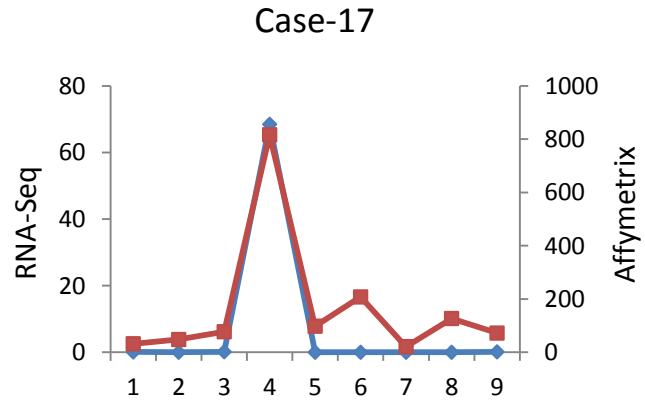

■ RNA-Seq  
■ Affymetrix

Supplement: mmc3.pdf [file mmc3.pdf]
